## Addendum

**Addendum: Liquid biopsy and multi-analyte testing guided treatment of *HER2* positive periampullary adenocarcinoma with durable complete response after trastuzumab based therapy****Rajnish Nagarkar<sup>1</sup>, Darshana Patil<sup>2</sup>, Sewanti Limaye<sup>3</sup>, Pradip Devhare<sup>2</sup>, Ashwini Ghaisas<sup>2</sup>, Navin Srivastava<sup>2</sup>, Sachin Apurwa<sup>2</sup>, Sanket Patil<sup>2</sup>, Jinumary John<sup>2</sup>, Zarrine Raazi<sup>2</sup>, Aditya Shreenivas<sup>4</sup>, Janani Sambath<sup>5,6</sup>, Ajay Srinivasan<sup>2</sup>, Prashant Kumar<sup>2,5,6</sup>, Dadasaheb Akolkar<sup>2</sup> and Rajan Datar<sup>2</sup>**<sup>1</sup>HCG Manavata Cancer Centre, Nasik, Maharashtra, India<sup>2</sup>Datar Cancer Genetics Limited, Nasik, Maharashtra, India<sup>3</sup>Kokilaben Dhirubhai Ambani Hospital and Medical Research Institute, Mumbai, Maharashtra, India<sup>4</sup>Department of Medical Oncology, Medical College Wisconsin, WI, USA<sup>5</sup>Institute of Bioinformatics, International Technology Park, Bangalore, Karnataka, India<sup>6</sup>Manipal Academy of Higher Education, Manipal, Karnataka, India**Published:** November 02, 2022**Copyright:** © 2022 Nagarkar et al. This is an open access article distributed under the terms of the [Creative Commons Attribution License](#) (CC BY 3.0), which permits unrestricted use, distribution, and reproduction in any medium, provided the original author and source are credited.**This article has an addendum:** The patient has previously consented to publication of de-identified findings.Original article: Oncotarget. 2020; 11:4195–4200. <https://doi.org/10.18632/oncotarget.27793>
